# Supplementary material for: Crystallization Thermodynamics of α-Lactose Monohydrate in Different Solvents
Source: MDPI journal article supplement (doi:10.3390/pharmaceutics14091774), 2022-08-25
Supplement: s1 [file s1]

# Supporting Information

## Crystallization Thermodynamics of $\alpha$ -lactose Monohydrate in Different Solvents

Youliang Guan <sup>1</sup>, Zujin Yang <sup>1\*</sup>, Kui Wu <sup>2</sup> and Hongbing Ji <sup>3\*</sup>

<sup>1</sup>School of Chemical Engineering and Technology, Sun Yat-sen University,  
Zhuhai 519082, China

<sup>2</sup>School of Chemistry and Chemical Engineering, Jinggangshan  
University, Ji'an 343009, China

<sup>3</sup>School of Chemistry, Sun Yat-sen University, Guangzhou 510275, China;  
jihb@mail.sysu.edu.cn

\*Correspondence: yangzj3@mail.sysu.edu.cn; jihb@mail.sysu.edu.cn

**Table S1.** Experimental and Model Fitted Solubility of  $\alpha$ -LM in 15 Solvents (P = 0.1 MPa) <sup>a</sup>.

| $T/K$      | $10^5 x_1^{\text{exp}}$ | $10^5 x_1^{\text{Apelblat}}$ | $10^5 x_1^{\text{Ah}}$ | $10^5 x_1^{\text{NRTL}}$ | $10^5 x_1^{\text{Wilson}}$ |
|------------|-------------------------|------------------------------|------------------------|--------------------------|----------------------------|
| Methanol   |                         |                              |                        |                          |                            |
| 273.95     | 4.39                    | 4.31                         | 4.36                   | 4.39                     | 4.31                       |
| 278.85     | 5.28                    | 5.25                         | 5.29                   | 5.28                     | 5.25                       |
| 283.55     | 6.28                    | 6.30                         | 6.33                   | 6.28                     | 6.31                       |
| 288.05     | 7.43                    | 7.47                         | 7.48                   | 7.43                     | 7.47                       |
| 293.45     | 9.02                    | 9.09                         | 9.08                   | 9.02                     | 9.09                       |
| 297.95     | 10.60                   | 10.65                        | 10.63                  | 10.60                    | 10.65                      |
| 303.55     | 12.86                   | 12.88                        | 12.84                  | 12.86                    | 12.88                      |
| 308.15     | 15.01                   | 14.98                        | 14.94                  | 15.02                    | 14.98                      |
| 313.65     | 17.98                   | 17.84                        | 17.81                  | 17.97                    | 17.84                      |
| 318.25     | 20.53                   | 20.55                        | 20.55                  | 20.53                    | 20.55                      |
| 323.05     | 23.67                   | 23.72                        | 23.77                  | 23.67                    | 23.72                      |
| Ethanol    |                         |                              |                        |                          |                            |
| 274.05     | 2.21                    | 2.18                         | 2.16                   | 2.18                     | 2.24                       |
| 278.55     | 2.66                    | 2.65                         | 2.61                   | 2.65                     | 2.70                       |
| 283.15     | 3.20                    | 3.21                         | 3.15                   | 3.21                     | 3.24                       |
| 288.55     | 3.96                    | 3.98                         | 3.89                   | 3.98                     | 3.98                       |
| 293.15     | 4.69                    | 4.73                         | 4.63                   | 4.73                     | 4.72                       |
| 298.75     | 5.81                    | 5.80                         | 5.68                   | 5.80                     | 5.77                       |
| 302.95     | 6.75                    | 6.71                         | 6.60                   | 6.71                     | 6.67                       |
| 308.15     | 7.99                    | 7.98                         | 7.90                   | 7.98                     | 7.94                       |
| 313.25     | 9.37                    | 9.40                         | 9.38                   | 9.40                     | 9.37                       |
| 318.45     | 11.05                   | 11.02                        | 11.12                  | 11.02                    | 11.02                      |
| 322.95     | 12.57                   | 12.58                        | 12.84                  | 12.58                    | 12.64                      |
| 1-Propanol |                         |                              |                        |                          |                            |
| 273.95     | 2.10                    | 2.08                         | 2.06                   | 2.09                     | 2.12                       |
| 278.85     | 2.52                    | 2.54                         | 2.50                   | 2.54                     | 2.56                       |

|             |       |       |       |       |       |
|-------------|-------|-------|-------|-------|-------|
| 283.55      | 3.04  | 3.05  | 3.00  | 3.04  | 3.06  |
| 288.05      | 3.63  | 3.61  | 3.54  | 3.60  | 3.61  |
| 293.45      | 4.39  | 4.38  | 4.31  | 4.38  | 4.38  |
| 297.95      | 5.08  | 5.12  | 5.04  | 5.12  | 5.11  |
| 303.55      | 6.15  | 6.17  | 6.10  | 6.18  | 6.15  |
| 308.15      | 7.22  | 7.15  | 7.09  | 7.17  | 7.12  |
| 313.65      | 8.45  | 8.46  | 8.46  | 8.48  | 8.45  |
| 318.25      | 9.68  | 9.70  | 9.77  | 9.67  | 9.70  |
| 323.05      | 11.12 | 11.12 | 11.30 | 11.12 | 11.15 |
| Isopropanol |       |       |       |       |       |
| 273.95      | 1.93  | 1.95  | 1.80  | 1.95  | 1.96  |
| 278.85      | 2.54  | 2.53  | 2.38  | 2.53  | 2.53  |
| 283.55      | 3.23  | 3.22  | 3.07  | 3.22  | 3.22  |
| 288.05      | 4.10  | 4.04  | 3.89  | 4.07  | 4.04  |
| 293.45      | 5.25  | 5.26  | 5.13  | 5.26  | 5.26  |
| 297.95      | 6.53  | 6.52  | 6.40  | 6.55  | 6.51  |
| 303.55      | 8.37  | 8.44  | 8.36  | 8.39  | 8.44  |
| 308.15      | 10.29 | 10.38 | 10.34 | 10.28 | 10.38 |
| 313.65      | 13.25 | 13.21 | 13.23 | 13.23 | 13.21 |
| 318.25      | 16.21 | 16.07 | 16.16 | 16.21 | 16.07 |
| 323.05      | 19.54 | 19.62 | 19.80 | 19.54 | 19.61 |
| 1-Butanol   |       |       |       |       |       |
| 273.95      | 4.09  | 4.07  | 4.14  | 4.07  | 4.08  |
| 278.85      | 4.71  | 4.68  | 4.73  | 4.68  | 4.69  |
| 283.55      | 5.29  | 5.32  | 5.35  | 5.32  | 5.33  |
| 288.05      | 5.96  | 6.00  | 6.00  | 6.00  | 6.00  |
| 293.45      | 6.89  | 6.89  | 6.86  | 6.89  | 6.89  |
| 297.95      | 7.70  | 7.70  | 7.66  | 7.70  | 7.69  |
| 303.55      | 8.82  | 8.80  | 8.75  | 8.81  | 8.79  |

|            |       |       |       |       |       |
|------------|-------|-------|-------|-------|-------|
| 308.15     | 9.79  | 9.78  | 9.73  | 9.80  | 9.77  |
| 313.65     | 11.09 | 11.06 | 11.02 | 11.08 | 11.05 |
| 318.25     | 12.19 | 12.20 | 12.21 | 12.19 | 12.20 |
| 323.05     | 13.47 | 13.48 | 13.56 | 13.47 | 13.49 |
| Isobutanol |       |       |       |       |       |
| 273.95     | 2.44  | 2.45  | 2.46  | 2.45  | 2.45  |
| 278.85     | 2.83  | 2.84  | 2.85  | 2.84  | 2.85  |
| 283.55     | 3.26  | 3.26  | 3.26  | 3.26  | 3.27  |
| 288.05     | 3.72  | 3.71  | 3.70  | 3.71  | 3.71  |
| 293.45     | 4.32  | 4.30  | 4.28  | 4.31  | 4.30  |
| 297.95     | 4.86  | 4.85  | 4.83  | 4.85  | 4.85  |
| 303.55     | 5.60  | 5.60  | 5.58  | 5.61  | 5.60  |
| 308.15     | 6.29  | 6.29  | 6.27  | 6.29  | 6.28  |
| 313.65     | 7.17  | 7.18  | 7.17  | 7.18  | 7.17  |
| 318.25     | 7.96  | 8.00  | 8.02  | 7.96  | 8.00  |
| 323.05     | 8.96  | 8.93  | 8.98  | 8.96  | 8.94  |
| 2-Butanol  |       |       |       |       |       |
| 274.05     | 1.30  | 1.30  | 1.31  | 1.30  | 1.30  |
| 278.55     | 1.57  | 1.57  | 1.58  | 1.57  | 1.57  |
| 283.15     | 1.89  | 1.89  | 1.89  | 1.89  | 1.89  |
| 288.55     | 2.29  | 2.33  | 2.33  | 2.33  | 2.33  |
| 293.15     | 2.78  | 2.76  | 2.76  | 2.76  | 2.76  |
| 298.75     | 3.37  | 3.39  | 3.38  | 3.39  | 3.38  |
| 302.95     | 3.92  | 3.92  | 3.91  | 3.92  | 3.92  |
| 308.15     | 4.72  | 4.68  | 4.66  | 4.68  | 4.67  |
| 313.25     | 5.52  | 5.53  | 5.52  | 5.53  | 5.53  |
| 318.45     | 6.47  | 6.52  | 6.52  | 6.52  | 6.52  |
| 322.95     | 7.51  | 7.48  | 7.50  | 7.48  | 7.49  |
| 1-Pentanol |       |       |       |       |       |

|           |      |      |      |      |      |
|-----------|------|------|------|------|------|
| 273.95    | 1.89 | 1.87 | 1.88 | 1.87 | 1.89 |
| 278.85    | 2.28 | 2.27 | 2.27 | 2.27 | 2.28 |
| 283.55    | 2.69 | 2.72 | 2.71 | 2.71 | 2.73 |
| 288.05    | 3.21 | 3.21 | 3.18 | 3.20 | 3.21 |
| 293.45    | 3.85 | 3.88 | 3.85 | 3.87 | 3.88 |
| 297.95    | 4.51 | 4.53 | 4.49 | 4.52 | 4.52 |
| 303.55    | 5.48 | 5.44 | 5.40 | 5.45 | 5.43 |
| 308.15    | 6.29 | 6.29 | 6.26 | 6.31 | 6.28 |
| 313.65    | 7.49 | 7.44 | 7.43 | 7.48 | 7.43 |
| 318.25    | 8.45 | 8.52 | 8.54 | 8.45 | 8.52 |
| 323.05    | 9.78 | 9.76 | 9.85 | 9.78 | 9.78 |
| Isoamylol |      |      |      |      |      |
| 273.95    | 1.49 | 1.47 | 1.52 | 1.49 | 1.50 |
| 278.85    | 1.81 | 1.80 | 1.83 | 1.81 | 1.82 |
| 283.55    | 2.15 | 2.16 | 2.18 | 2.16 | 2.17 |
| 288.05    | 2.53 | 2.55 | 2.56 | 2.55 | 2.56 |
| 293.45    | 3.08 | 3.10 | 3.09 | 3.09 | 3.09 |
| 297.95    | 3.62 | 3.62 | 3.60 | 3.61 | 3.60 |
| 303.55    | 4.35 | 4.36 | 4.32 | 4.35 | 4.33 |
| 308.15    | 5.05 | 5.04 | 5.00 | 5.04 | 5.02 |
| 313.65    | 5.99 | 5.96 | 5.93 | 5.97 | 5.94 |
| 318.25    | 6.80 | 6.81 | 6.81 | 6.81 | 6.81 |
| 323.05    | 7.79 | 7.80 | 7.85 | 7.79 | 7.83 |
| 1-Hexanol |      |      |      |      |      |
| 274.05    | 0.80 | 0.81 | 0.76 | 0.79 | 0.81 |
| 278.55    | 0.99 | 1.01 | 0.96 | 0.99 | 1.01 |
| 283.15    | 1.27 | 1.26 | 1.22 | 1.25 | 1.26 |
| 288.55    | 1.63 | 1.62 | 1.59 | 1.63 | 1.63 |
| 293.15    | 2.01 | 2.00 | 1.98 | 2.02 | 2.01 |

|            |       |       |       |       |       |
|------------|-------|-------|-------|-------|-------|
| 298.75     | 2.57  | 2.57  | 2.56  | 2.59  | 2.58  |
| 302.95     | 3.11  | 3.09  | 3.09  | 3.11  | 3.09  |
| 308.15     | 3.88  | 3.86  | 3.87  | 3.87  | 3.85  |
| 313.25     | 4.75  | 4.77  | 4.79  | 4.75  | 4.76  |
| 318.45     | 5.85  | 5.89  | 5.92  | 5.85  | 5.88  |
| 322.95     | 7.08  | 7.05  | 7.07  | 7.08  | 7.07  |
| 1-Heptanol |       |       |       |       |       |
| 274.05     | 2.08  | 2.10  | 2.11  | 2.09  | 2.10  |
| 278.55     | 2.47  | 2.48  | 2.49  | 2.48  | 2.49  |
| 283.15     | 2.93  | 2.94  | 2.94  | 2.94  | 2.94  |
| 288.55     | 3.58  | 3.55  | 3.55  | 3.56  | 3.56  |
| 293.15     | 4.16  | 4.15  | 4.14  | 4.16  | 4.16  |
| 298.75     | 5.01  | 4.99  | 4.98  | 5.00  | 4.99  |
| 302.95     | 5.76  | 5.71  | 5.69  | 5.71  | 5.70  |
| 308.15     | 6.65  | 6.70  | 6.68  | 6.69  | 6.69  |
| 313.25     | 7.73  | 7.80  | 7.79  | 7.78  | 7.79  |
| 318.45     | 9.10  | 9.06  | 9.07  | 9.05  | 9.06  |
| 322.95     | 10.29 | 10.28 | 10.32 | 10.31 | 10.30 |
| 1-Octanol  |       |       |       |       |       |
| 274.05     | 1.66  | 1.65  | 1.70  | 1.65  | 1.68  |
| 278.55     | 1.97  | 1.98  | 2.01  | 1.98  | 2.00  |
| 283.15     | 2.34  | 2.36  | 2.38  | 2.36  | 2.37  |
| 288.55     | 2.88  | 2.87  | 2.88  | 2.87  | 2.88  |
| 293.15     | 3.39  | 3.38  | 3.36  | 3.38  | 3.37  |
| 298.75     | 4.05  | 4.08  | 4.05  | 4.08  | 4.06  |
| 302.95     | 4.70  | 4.67  | 4.64  | 4.67  | 4.65  |
| 308.15     | 5.50  | 5.49  | 5.46  | 5.49  | 5.47  |
| 313.25     | 6.39  | 6.40  | 6.37  | 6.40  | 6.38  |
| 318.45     | 7.41  | 7.43  | 7.44  | 7.43  | 7.43  |

|                |      |      |      |      |      |
|----------------|------|------|------|------|------|
| 322.95         | 8.43 | 8.42 | 8.47 | 8.42 | 8.45 |
| Cyclohexanone  |      |      |      |      |      |
| 274.05         | 1.03 | 1.06 | 1.02 | 1.04 | 1.06 |
| 278.55         | 1.29 | 1.31 | 1.27 | 1.30 | 1.32 |
| 283.15         | 1.61 | 1.62 | 1.58 | 1.62 | 1.63 |
| 288.55         | 2.09 | 2.07 | 2.03 | 2.08 | 2.08 |
| 293.15         | 2.56 | 2.53 | 2.50 | 2.55 | 2.54 |
| 298.75         | 3.24 | 3.21 | 3.19 | 3.23 | 3.21 |
| 302.95         | 3.85 | 3.82 | 3.80 | 3.83 | 3.82 |
| 308.15         | 4.69 | 4.70 | 4.70 | 4.70 | 4.69 |
| 313.25         | 5.69 | 5.74 | 5.76 | 5.71 | 5.72 |
| 318.45         | 6.97 | 7.00 | 7.03 | 6.96 | 6.98 |
| 322.95         | 8.32 | 8.28 | 8.32 | 8.32 | 8.31 |
| Acetonitrile   |      |      |      |      |      |
| 274.05         | 1.77 | 1.80 | 1.77 | 1.79 | 1.79 |
| 278.55         | 2.10 | 2.09 | 2.06 | 2.09 | 2.09 |
| 283.15         | 2.43 | 2.43 | 2.41 | 2.44 | 2.44 |
| 288.55         | 2.91 | 2.90 | 2.88 | 2.90 | 2.90 |
| 293.15         | 3.35 | 3.34 | 3.33 | 3.35 | 3.35 |
| 298.75         | 3.97 | 3.96 | 3.96 | 3.97 | 3.97 |
| 302.95         | 4.49 | 4.49 | 4.49 | 4.49 | 4.49 |
| 308.15         | 5.20 | 5.22 | 5.22 | 5.22 | 5.22 |
| 313.25         | 6.02 | 6.03 | 6.04 | 6.02 | 6.02 |
| 318.45         | 6.97 | 6.96 | 6.98 | 6.95 | 6.95 |
| 322.95         | 7.85 | 7.85 | 7.88 | 7.86 | 7.86 |
| Propinoic acid |      |      |      |      |      |
| 274.05         | 1.81 | 1.85 | 1.81 | 1.82 | 1.84 |
| 278.55         | 2.19 | 2.22 | 2.19 | 2.20 | 2.22 |
| 283.15         | 2.65 | 2.66 | 2.64 | 2.66 | 2.67 |

|        |       |       |       |       |       |
|--------|-------|-------|-------|-------|-------|
| 288.55 | 3.31  | 3.27  | 3.27  | 3.28  | 3.29  |
| 293.15 | 3.93  | 3.89  | 3.90  | 3.91  | 3.91  |
| 298.75 | 4.79  | 4.78  | 4.80  | 4.80  | 4.79  |
| 302.95 | 5.57  | 5.55  | 5.58  | 5.58  | 5.55  |
| 308.15 | 6.68  | 6.66  | 6.69  | 6.67  | 6.64  |
| 313.25 | 7.90  | 7.94  | 7.95  | 7.91  | 7.90  |
| 318.45 | 9.34  | 9.45  | 9.44  | 9.34  | 9.41  |
| 322.95 | 11.03 | 10.95 | 10.92 | 11.03 | 11.00 |

<sup>a</sup>  $\chi_1^{\text{exp}}$  is the experimental solubility of  $\alpha$ -LM in pure solvents; the standard uncertainty of temperature is  $u(T)$ = 0.05 K; the relative uncertainty of pressure is  $u_r(P)$  =0.06. The relative standard uncertainty of solubility is  $u_r(\chi_1)$  =0.045.

**Table S2.** Dissolution Thermodynamic Properties of  $\alpha$ -LM in 15 Solvents <sup>a</sup>.

| <i>T</i> (K) | $\Delta_{dis}H$ (J/mol) | $\Delta_{dis}S$ (J/mol/K) | $\Delta_{dis}G$ (J/mol) |
|--------------|-------------------------|---------------------------|-------------------------|
| Methanol     |                         |                           |                         |
| 273.95       | 1.1224                  | 0.0045                    | -0.0982                 |
| 278.85       | 1.3499                  | 0.0053                    | -0.1218                 |
| 283.55       | 1.6074                  | 0.0062                    | -0.1487                 |
| 288.05       | 1.9007                  | 0.0072                    | -0.1790                 |
| 293.45       | 2.3075                  | 0.0086                    | -0.2219                 |
| 297.95       | 2.7112                  | 0.0100                    | -0.2640                 |
| 303.55       | 3.2903                  | 0.0119                    | -0.3253                 |
| 308.15       | 3.8414                  | 0.0137                    | -0.3841                 |
| 313.65       | 4.6004                  | 0.0162                    | -0.4657                 |
| 318.25       | 5.2538                  | 0.0182                    | -0.5445                 |
| 323.05       | 6.0575                  | 0.0207                    | -0.6380                 |
| Ethanol      |                         |                           |                         |
| 274.05       | 0.5760                  | 0.0022                    | -0.0403                 |
| 278.55       | 0.6918                  | 0.0027                    | -0.0493                 |



|        |        |        |         |
|--------|--------|--------|---------|
| 283.15 | 0.8326 | 0.0032 | -0.0601 |
| 288.55 | 1.0298 | 0.0038 | -0.0752 |
| 293.15 | 1.2216 | 0.0045 | -0.0906 |
| 298.75 | 1.5124 | 0.0054 | -0.1124 |
| 302.95 | 1.7569 | 0.0062 | -0.1316 |
| 308.15 | 2.0810 | 0.0073 | -0.1596 |
| 313.25 | 2.4393 | 0.0084 | -0.1918 |
| 318.45 | 2.8761 | 0.0098 | -0.2294 |
| 322.95 | 3.2734 | 0.0110 | -0.2673 |

#### 1-Propanol

|        |        |        |         |
|--------|--------|--------|---------|
| 273.95 | 0.5227 | 0.0021 | -0.0475 |
| 278.85 | 0.6290 | 0.0025 | -0.0586 |
| 283.55 | 0.7586 | 0.0029 | -0.0712 |
| 288.05 | 0.9036 | 0.0034 | -0.0853 |
| 293.45 | 1.0952 | 0.0041 | -0.1053 |
| 297.95 | 1.2674 | 0.0047 | -0.1247 |
| 303.55 | 1.5338 | 0.0056 | -0.1530 |
| 308.15 | 1.7993 | 0.0064 | -0.1799 |
| 313.65 | 2.1072 | 0.0074 | -0.2172 |
| 318.25 | 2.4145 | 0.0084 | -0.2530 |
| 323.05 | 2.7739 | 0.0095 | -0.2954 |

#### Isopropanol

|        |        |        |         |
|--------|--------|--------|---------|
| 273.95 | 0.6394 | 0.0025 | -0.0446 |
| 278.85 | 0.8535 | 0.0033 | -0.0587 |
| 283.55 | 1.0936 | 0.0041 | -0.0760 |
| 288.05 | 1.4004 | 0.0052 | -0.0967 |
| 293.45 | 1.8094 | 0.0066 | -0.1283 |
| 297.95 | 2.2665 | 0.0081 | -0.1613 |
| 303.55 | 2.9241 | 0.0103 | -0.2130 |

|        |        |        |         |
|--------|--------|--------|---------|
| 308.15 | 3.6123 | 0.0126 | -0.2660 |
| 313.65 | 4.6771 | 0.0160 | -0.3445 |
| 318.25 | 5.7435 | 0.0194 | -0.4253 |
| 323.05 | 6.9502 | 0.0231 | -0.5269 |

#### Acetonitrile

|        |        |        |         |
|--------|--------|--------|---------|
| 274.05 | 0.3871 | 0.0016 | -0.0408 |
| 278.55 | 0.4596 | 0.0018 | -0.0484 |
| 283.15 | 0.5341 | 0.0021 | -0.0574 |
| 288.55 | 0.6398 | 0.0025 | -0.0697 |
| 293.15 | 0.7405 | 0.0028 | -0.0818 |
| 298.75 | 0.8798 | 0.0033 | -0.0988 |
| 302.95 | 0.9990 | 0.0037 | -0.1133 |
| 308.15 | 1.1604 | 0.0042 | -0.1338 |
| 313.25 | 1.3532 | 0.0048 | -0.1568 |
| 318.45 | 1.5785 | 0.0055 | -0.1837 |
| 322.95 | 1.7971 | 0.0062 | -0.2101 |

#### 1-Butanol

|        |        |        |         |
|--------|--------|--------|---------|
| 273.95 | 0.7342 | 0.0030 | -0.0930 |
| 278.85 | 0.8441 | 0.0034 | -0.1087 |
| 283.55 | 0.9482 | 0.0038 | -0.1257 |
| 288.05 | 1.0679 | 0.0042 | -0.1438 |
| 293.45 | 1.2357 | 0.0048 | -0.1681 |
| 297.95 | 1.3810 | 0.0053 | -0.1907 |
| 303.55 | 1.5811 | 0.0059 | -0.2220 |
| 308.15 | 1.7550 | 0.0065 | -0.2506 |
| 313.65 | 1.9880 | 0.0073 | -0.2884 |
| 318.25 | 2.1858 | 0.0079 | -0.3232 |
| 323.05 | 2.4155 | 0.0086 | -0.3628 |

#### Isobutanol

|        |        |        |         |
|--------|--------|--------|---------|
| 273.95 | 0.4711 | 0.0019 | -0.0559 |
| 278.85 | 0.5466 | 0.0022 | -0.0661 |
| 283.55 | 0.6293 | 0.0025 | -0.0771 |
| 288.05 | 0.7183 | 0.0028 | -0.0890 |
| 293.45 | 0.8350 | 0.0032 | -0.1052 |
| 297.95 | 0.9386 | 0.0036 | -0.1203 |
| 303.55 | 1.0824 | 0.0040 | -0.1415 |
| 308.15 | 1.2175 | 0.0045 | -0.1611 |
| 313.65 | 1.3926 | 0.0050 | -0.1872 |
| 318.25 | 1.5547 | 0.0056 | -0.2116 |
| 323.05 | 1.7637 | 0.0062 | -0.2398 |

2-Butanol

|        |        |        |         |
|--------|--------|--------|---------|
| 274.05 | 0.3433 | 0.0014 | -0.0297 |
| 278.55 | 0.4140 | 0.0016 | -0.0363 |
| 283.15 | 0.4976 | 0.0019 | -0.0444 |
| 288.55 | 0.6032 | 0.0023 | -0.0558 |
| 293.15 | 0.7321 | 0.0027 | -0.0674 |
| 298.75 | 0.8885 | 0.0033 | -0.0841 |
| 302.95 | 1.0334 | 0.0037 | -0.0988 |
| 308.15 | 1.2425 | 0.0044 | -0.1198 |
| 313.25 | 1.4550 | 0.0051 | -0.1440 |
| 318.45 | 1.7045 | 0.0059 | -0.1726 |
| 322.95 | 1.9773 | 0.0067 | -0.2011 |

1-Pentanol

|        |        |        |         |
|--------|--------|--------|---------|
| 273.95 | 0.4665 | 0.0019 | -0.0430 |
| 278.85 | 0.5626 | 0.0022 | -0.0530 |
| 283.55 | 0.6644 | 0.0026 | -0.0643 |
| 288.05 | 0.7926 | 0.0030 | -0.0769 |
| 293.45 | 0.9498 | 0.0036 | -0.0947 |

|        |        |        |         |
|--------|--------|--------|---------|
| 297.95 | 1.1132 | 0.0041 | -0.1119 |
| 303.55 | 1.3509 | 0.0049 | -0.1370 |
| 308.15 | 1.5515 | 0.0056 | -0.1609 |
| 313.65 | 1.8482 | 0.0065 | -0.1939 |
| 318.25 | 2.0847 | 0.0073 | -0.2256 |
| 323.05 | 2.4118 | 0.0083 | -0.2629 |

Isoamylol

|        |        |        |         |
|--------|--------|--------|---------|
| 273.95 | 0.3691 | 0.0015 | -0.0342 |
| 278.85 | 0.4486 | 0.0018 | -0.0422 |
| 283.55 | 0.5321 | 0.0021 | -0.0512 |
| 288.05 | 0.6259 | 0.0024 | -0.0613 |
| 293.45 | 0.7618 | 0.0029 | -0.0755 |
| 297.95 | 0.8950 | 0.0033 | -0.0893 |
| 303.55 | 1.0758 | 0.0039 | -0.1094 |
| 308.15 | 1.2483 | 0.0045 | -0.1285 |
| 313.65 | 1.4810 | 0.0052 | -0.1550 |
| 318.25 | 1.6838 | 0.0059 | -0.1804 |
| 323.05 | 1.9286 | 0.0066 | -0.2104 |

1-Hexanol

|        |        |        |         |
|--------|--------|--------|---------|
| 274.05 | 0.2551 | 0.0010 | -0.0184 |
| 278.55 | 0.3171 | 0.0012 | -0.0234 |
| 283.15 | 0.4070 | 0.0015 | -0.0297 |
| 288.55 | 0.5248 | 0.0020 | -0.0391 |
| 293.15 | 0.6482 | 0.0024 | -0.0490 |
| 298.75 | 0.8326 | 0.0030 | -0.0641 |
| 302.95 | 1.0090 | 0.0036 | -0.0779 |
| 308.15 | 1.2675 | 0.0044 | -0.0986 |
| 313.25 | 1.5605 | 0.0054 | -0.1234 |
| 318.45 | 1.9425 | 0.0066 | -0.1545 |

|        |        |        |         |
|--------|--------|--------|---------|
| 322.95 | 2.3791 | 0.0079 | -0.1872 |
|--------|--------|--------|---------|

1-Heptanol

|        |        |        |         |
|--------|--------|--------|---------|
| 274.05 | 0.4967 | 0.0020 | -0.0479 |
| 278.55 | 0.5885 | 0.0023 | -0.0577 |
| 283.15 | 0.6980 | 0.0027 | -0.0693 |
| 288.55 | 0.8544 | 0.0033 | -0.0854 |
| 293.15 | 0.9919 | 0.0037 | -0.1014 |
| 298.75 | 1.1966 | 0.0044 | -0.1241 |
| 302.95 | 1.3751 | 0.0050 | -0.1438 |
| 308.15 | 1.5896 | 0.0057 | -0.1716 |
| 313.25 | 1.8527 | 0.0066 | -0.2031 |
| 318.45 | 2.1889 | 0.0076 | -0.2399 |
| 322.95 | 2.4881 | 0.0086 | -0.2762 |

1-Octanol

|        |        |        |         |
|--------|--------|--------|---------|
| 274.05 | 0.4025 | 0.0016 | -0.0384 |
| 278.55 | 0.4783 | 0.0019 | -0.0463 |
| 283.15 | 0.5692 | 0.0022 | -0.0558 |
| 288.55 | 0.6991 | 0.0027 | -0.0690 |
| 293.15 | 0.8226 | 0.0031 | -0.0822 |
| 298.75 | 0.9840 | 0.0036 | -0.1009 |
| 302.95 | 1.1418 | 0.0042 | -0.1172 |
| 308.15 | 1.3347 | 0.0048 | -0.1403 |
| 313.25 | 1.5526 | 0.0055 | -0.1664 |
| 318.45 | 1.8005 | 0.0063 | -0.1969 |
| 322.95 | 2.0483 | 0.0070 | -0.2269 |

Cyclohexanone

|        |        |        |         |
|--------|--------|--------|---------|
| 274.05 | 0.3162 | 0.0012 | -0.0242 |
| 278.55 | 0.3939 | 0.0015 | -0.0305 |
| 283.15 | 0.4936 | 0.0019 | -0.0384 |

|        |        |        |         |
|--------|--------|--------|---------|
| 288.55 | 0.6403 | 0.0024 | -0.0499 |
| 293.15 | 0.7847 | 0.0029 | -0.0620 |
| 298.75 | 0.9917 | 0.0036 | -0.0799 |
| 302.95 | 1.1820 | 0.0042 | -0.0961 |
| 308.15 | 1.4425 | 0.0051 | -0.1201 |
| 313.25 | 1.7606 | 0.0061 | -0.1486 |
| 318.45 | 2.1789 | 0.0074 | -0.1838 |
| 322.95 | 2.6402 | 0.0089 | -0.2203 |

Propinoic acid

|        |        |        |         |
|--------|--------|--------|---------|
| 274.05 | 0.4781 | 0.0019 | -0.0419 |
| 278.55 | 0.5781 | 0.0023 | -0.0514 |
| 283.15 | 0.7003 | 0.0027 | -0.0628 |
| 288.55 | 0.8749 | 0.0033 | -0.0790 |
| 293.15 | 1.0381 | 0.0039 | -0.0953 |
| 298.75 | 1.2680 | 0.0046 | -0.1190 |
| 302.95 | 1.4781 | 0.0053 | -0.1399 |
| 308.15 | 1.7815 | 0.0063 | -0.1701 |
| 313.25 | 2.1242 | 0.0074 | -0.2050 |
| 318.45 | 2.5521 | 0.0088 | -0.2472 |
| 322.95 | 3.0870 | 0.0105 | -0.2904 |

---

<sup>a</sup> The values of  $\Delta_{dis}G$ ,  $\Delta_{dis}H$ , and  $\Delta_{dis}S$  were calculated with Equations (19)–(26).
